# Supplementary material for: Investigating the increased-capacity mechanism of porous carbon materials in lithium-ion batteries
Source: Royal Society of Chemistry journal article supplement (doi:10.1039/d0ta04054a), 2020-01-01
Supplement: d0ta04054a1.pdf [file d0ta04054a1.pdf]

**Investigating the Increased-Capacity Mechanism of Porous Carbon Materials in  
Lithium-Ion Batteries**

Kai Zhou<sup>1,2</sup>, Shuwei Wang<sup>1,2</sup>, Shichao Zhang<sup>1</sup>, Feiyu Kang<sup>1,2</sup>, Baohua Li<sup>1,\*</sup>

*1. ShenZhen Key Laboratory of Power Battery Safety and Shenzhen Geim Graphene Center, Graduate School at Shenzhen, Tsinghua University, Shenzhen, 518055, China*

*2. School of Materials Science and Engineering, Tsinghua University, Beijing 100084, P. R. China.*

*Email: libh@mail.sz.tsinghua.edu.cn*

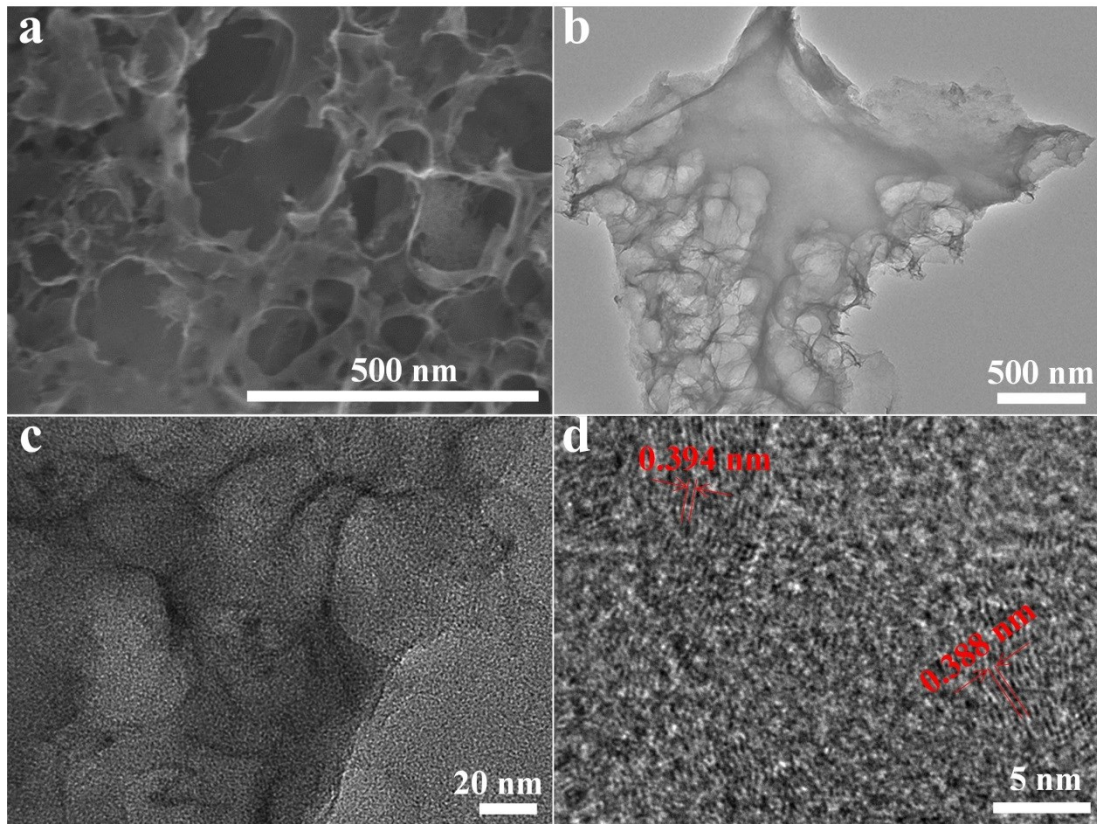

**Figure S1. Morphology characterization of the Ni-C materials.** (a) SEM image of porous carbon. (b-d) TEM images of the porous carbon.

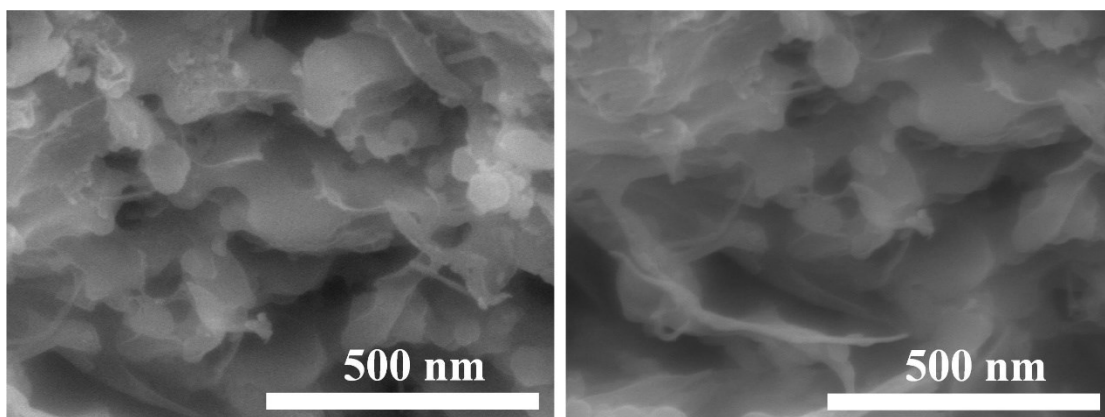

**Figure S2.** Morphology characterization of the Ni—free-C materials characterized by SEM.

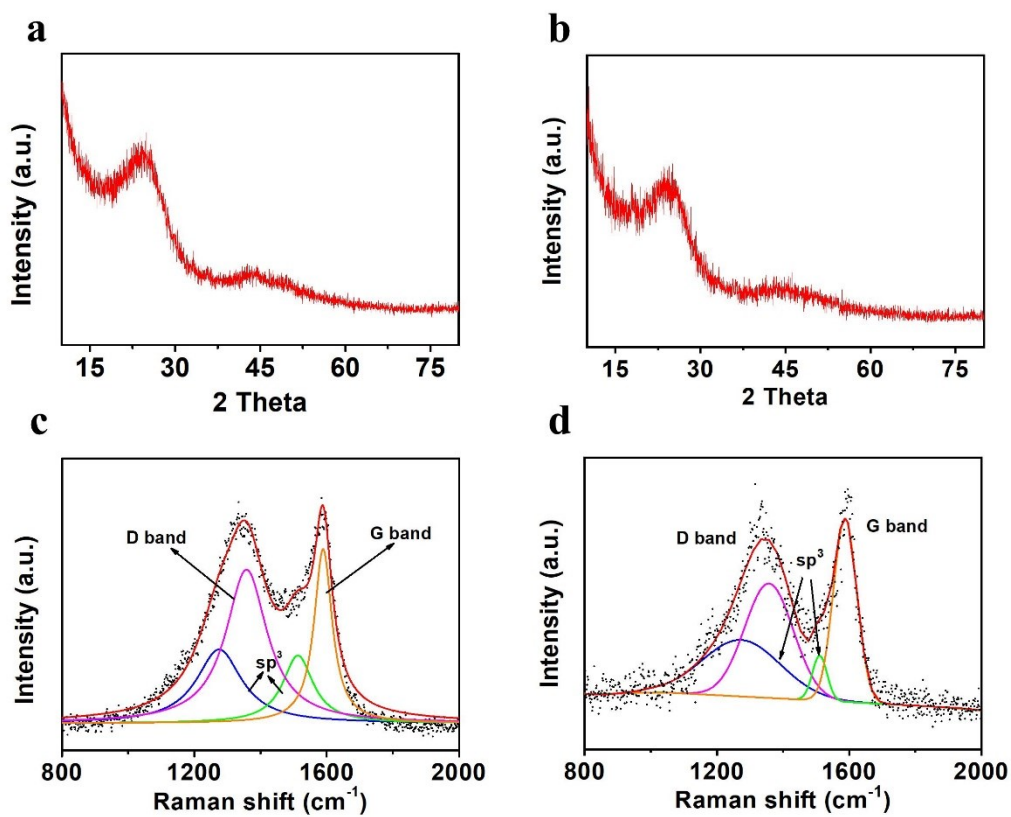

**Figure S3. Structural characterization of the samples.** (a) XRD pattern of (a) Ni-C and (b) Ni-free-C. Raman spectrum of the (c) Ni-C and (d) Ni-free-C.

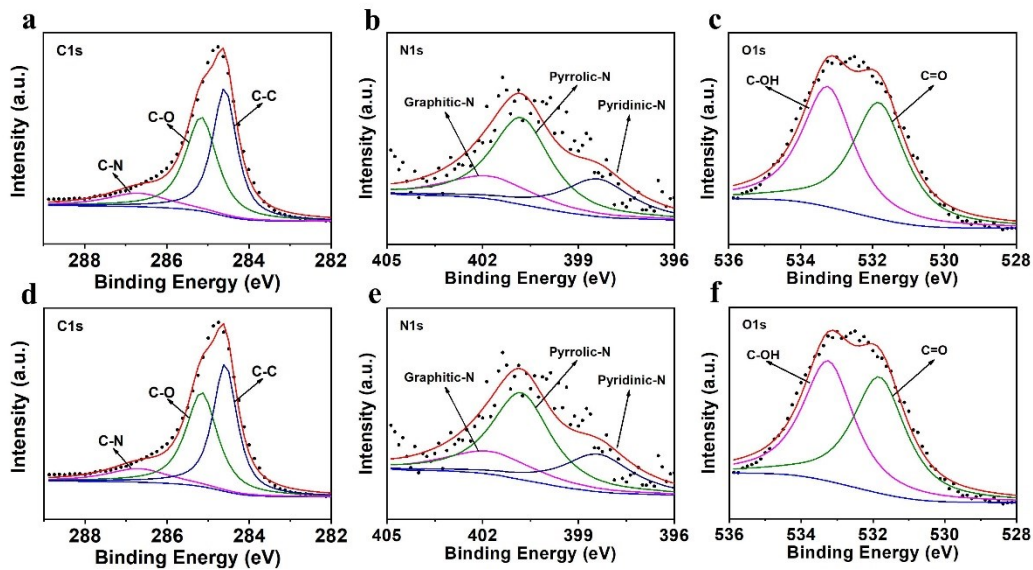

**Figure S4.** X-ray photoelectron spectroscopic (XPS) high-resolution (a) C1s, (b) N1s, and (c) O1s spectra of Ni-C. XPS high-resolution (a) C1s, (b) N1s, and (c) O1s spectra of Ni-free-C.

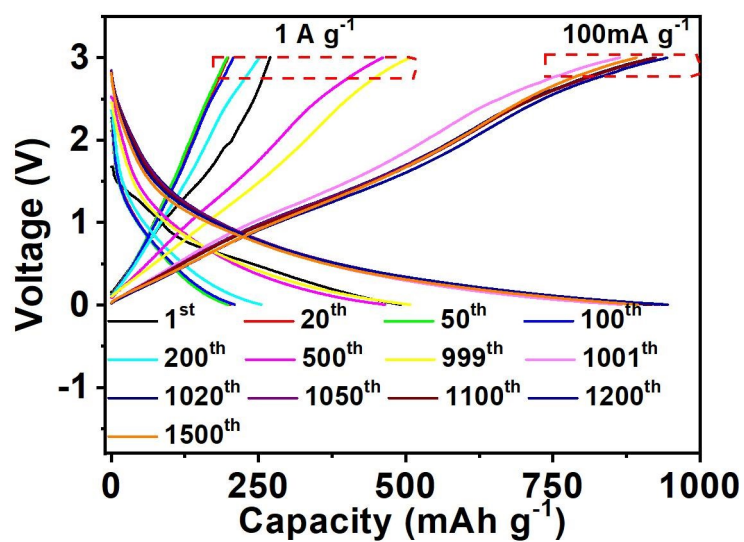

**Figure S5.** The charge-discharge profiles of the long-term cycling performance with first 1000 cycles at  $1 \text{ A g}^{-1}$  and followed 500 cycles at  $100 \text{ mA g}^{-1}$ .

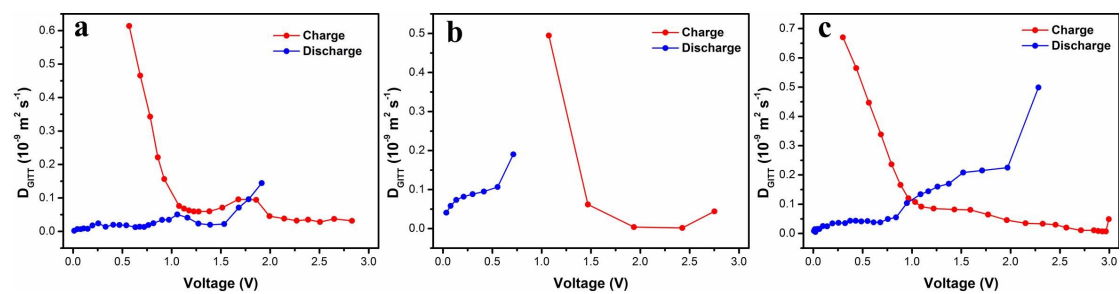

**Figure S6.** The cycled or rested cells Li ion diffusion kinetic calculated by GITT. The coefficient versus state of charge and discharge of (a) the rested cells, (b) the cells cycled at  $100 \text{ mA g}^{-1}$ , and (c) the cells cycled at  $1 \text{ A g}^{-1}$ .

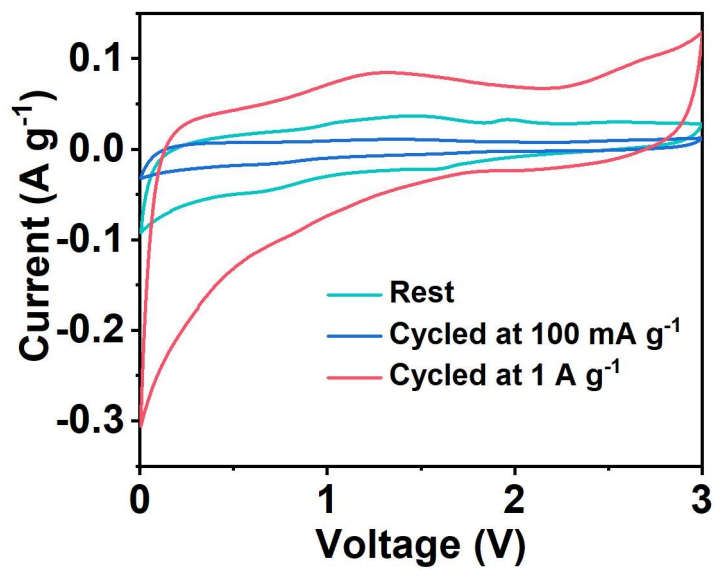

**Figure S7.** Analytical comparison of electrochemical mechanism of cells cycled or rested with 936 h. Cyclic voltammogram curves at a scan rate of 0.1 mV s<sup>-1</sup>.



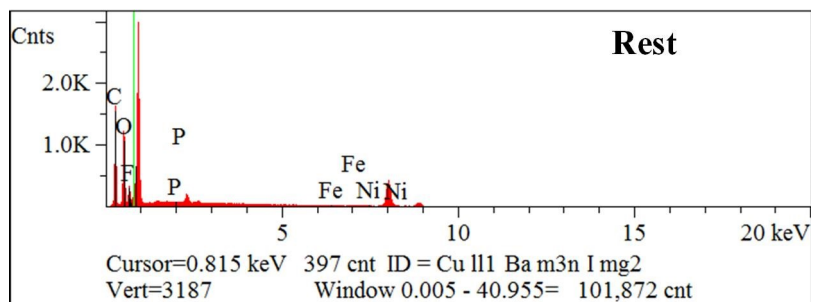

**Figure S8.** The elemental energy dispersive spectrum of the rested carbon electrodes for 936 h.

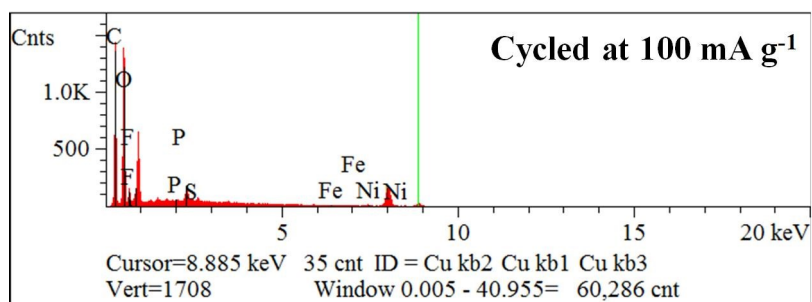

**Figure S9.** The elemental energy dispersive spectrum of the carbon electrodes after cycled at 100 mA g<sup>-1</sup> for 936 h.

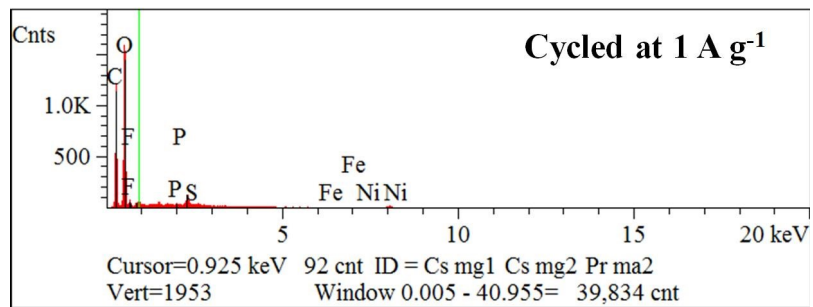

**Figure S10.** The elemental energy dispersive spectrum of the carbon electrodes after cycled at 1 A g<sup>-1</sup> for 936 h.

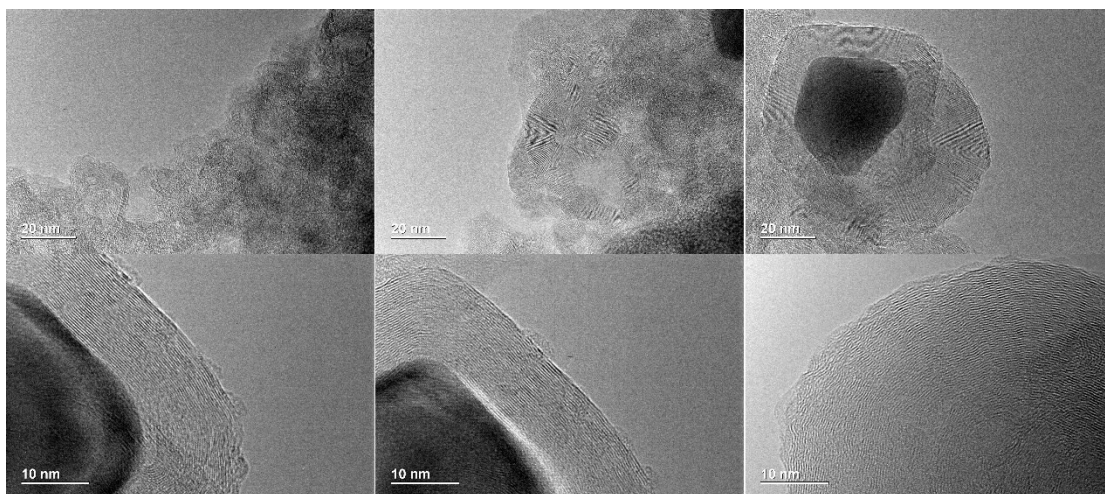

**Figure S11.** High-resolution TEM images of the porous carbon materials after cycled at  $1 \text{ A g}^{-1}$  for 936 h, acquired from the other areas.

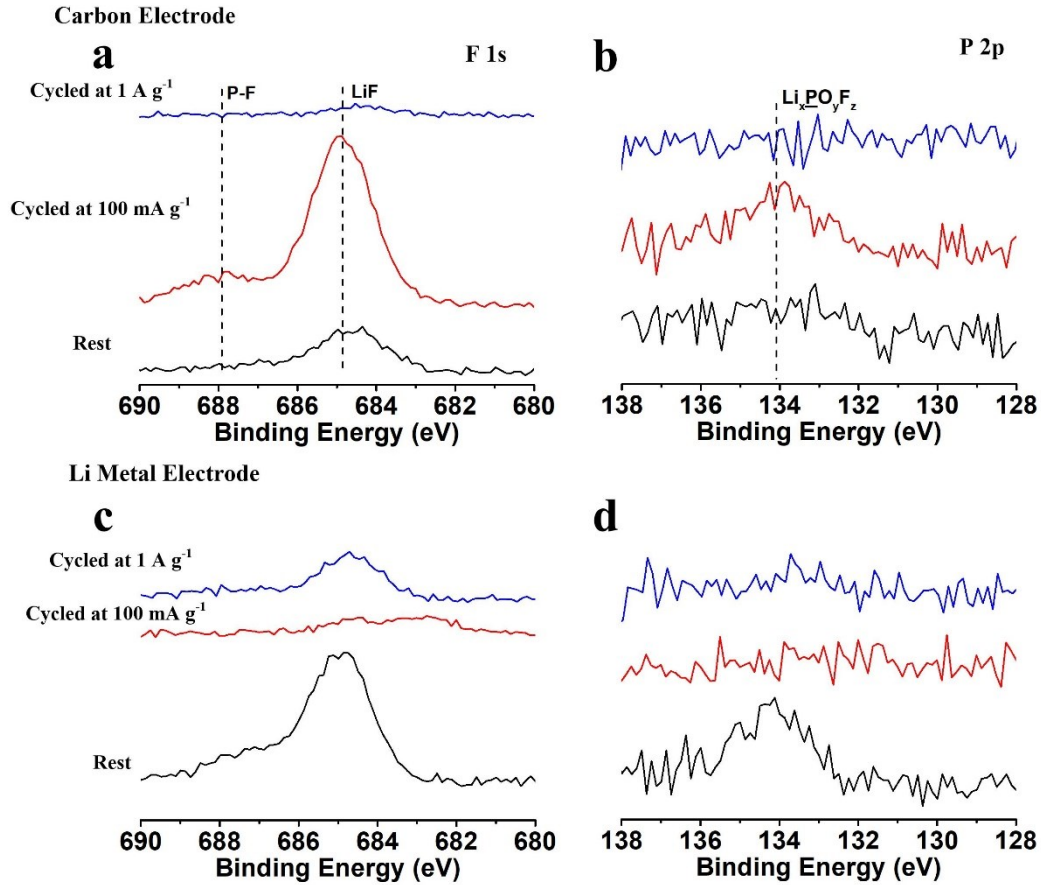

**Figure S12. Characterization of components of SEI covered on the surface of cycled carbon and Li metal electrodes.** XPS (a) F 1s and (b) P 2p spectra of carbon electrodes from (a) the rested cells, (b) the cells cycled at  $100 \text{ mA g}^{-1}$ , and (c) the cells cycled at  $1 \text{ A g}^{-1}$  for 936 h. (c) F 1s and (d) P 2p spectra of Li metal electrodes for three groups of batteries after cycled or rested.

**Table. S1** The elemental quantitative analysis of the carbon electrodes after cycled or rested from SEM-EDS measurement.

| Sample                           | C (%)  | O (%)  | F (%)  | P (%) | Other (%) |
|----------------------------------|--------|--------|--------|-------|-----------|
| Rest                             | 39.575 | 46.134 | 12.984 | 0.140 | 1.054     |
| Cycled at 100 mA g <sup>-1</sup> | 38.056 | 53.710 | 7.227  | 0.270 | 0.679     |
| Cycled at 1 A g <sup>-1</sup>    | 33.685 | 62.522 | 3.200  | 0.151 | 0.435     |
